# Supplementary material
Source: Springer Nature journal article supplement (https://www.springermedizin.de/resource/supplementary/12950_2011_235_MOESM1_ESM.pdf/9558282)

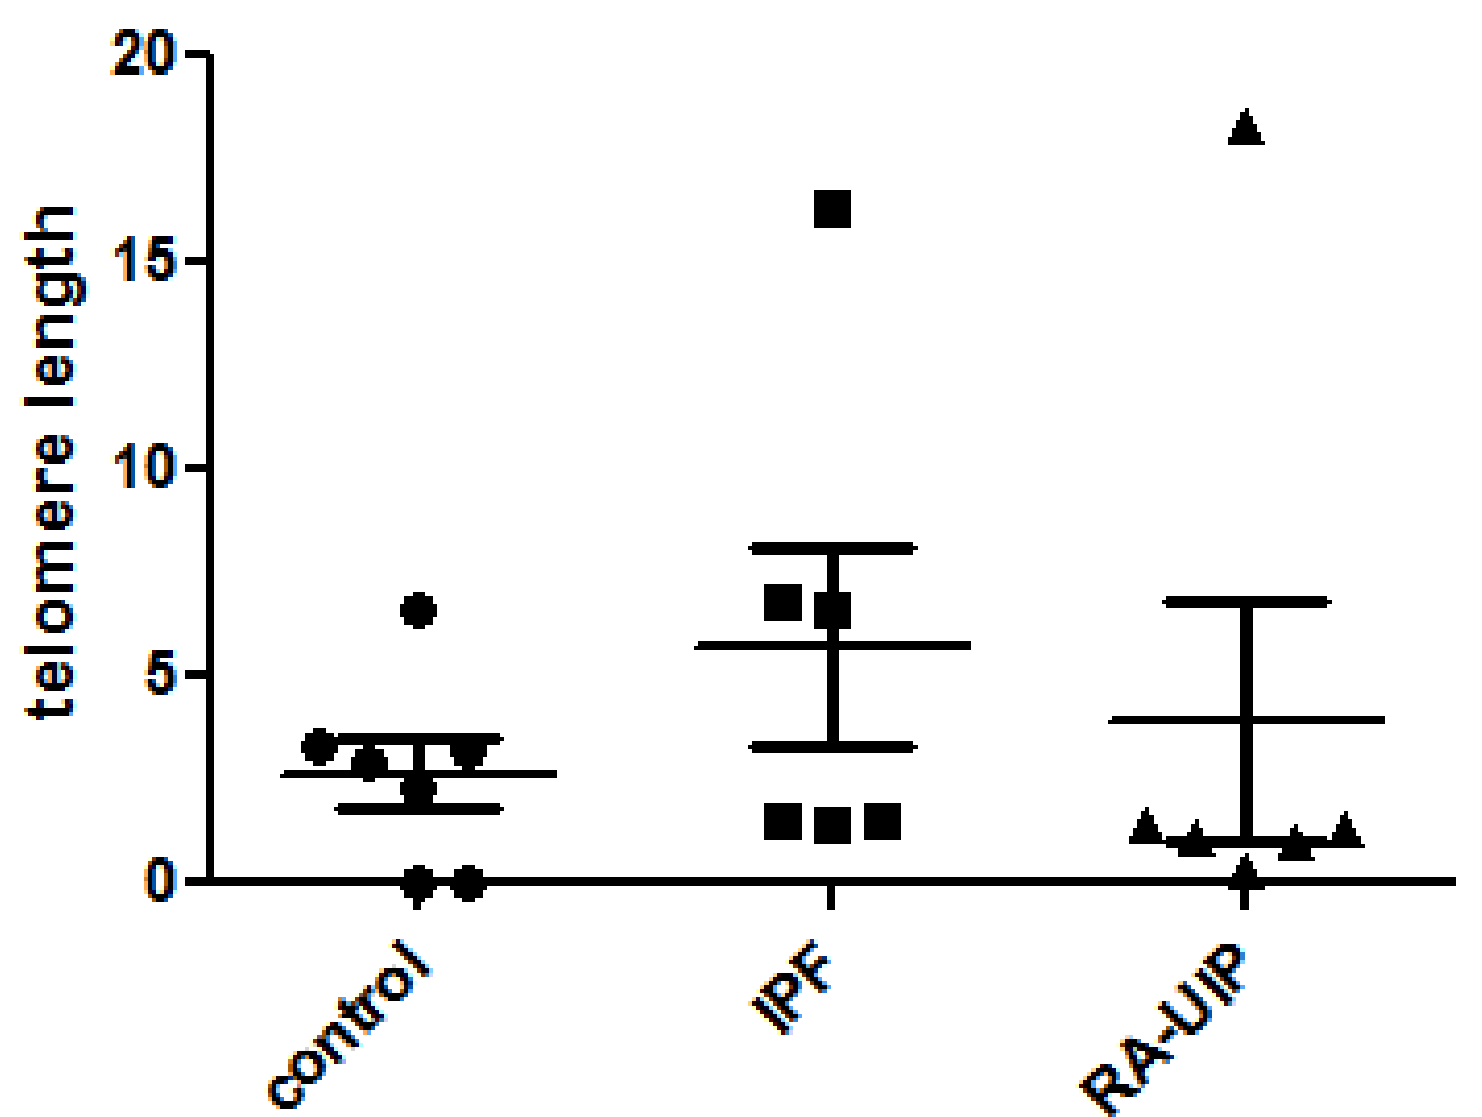

Supplement: MOESM1 [file 9558282]
